# Supplementary material for: Dihydrothiazolo ring-fused 2-pyridone antimicrobial compounds treat Streptococcus pyogenes skin and soft tissue infection
Source: PubMed Central journal article supplement — bioRxiv. 2024 Jan 3:2024.01.02.573960. Preprint. [Version 1] doi: 10.1101/2024.01.02.573960 (PMC10802287; doi:10.1101/2024.01.02.573960), 2024-01-03
Supplement: media-1.pdf [file media-1.pdf]

## SUPPLEMENTARY MATERIALS

### **Dihydrothiazolo ring-fused 2-pyridone antimicrobial compounds treat *Streptococcus pyogenes* skin and soft tissue infection**

Zongsen Zou<sup>1</sup>, Chloe L. P. Obernuefemann<sup>1</sup>, Pardeep Singh<sup>2</sup>, Jerome S. Pinkner<sup>1</sup>, Wei Xu<sup>1</sup>, Taylor M. Nye<sup>1</sup>, Karen W. Dodson<sup>1</sup>, Fredrik Almqvist<sup>2\*</sup>, Scott J. Hultgren<sup>1\*</sup>, Michael G. Caparon<sup>1\*</sup>

<sup>1</sup>Department of Molecular Microbiology, Center for Women's Infectious Disease Research, Washington University School of Medicine, St. Louis, Missouri 63110, United States.

<sup>2</sup>Department of Chemistry, Umeå University, SE-90187 Umeå, Sweden.

\*To whom correspondence may be addressed.

## SUPPLEMENTARY FIGURES

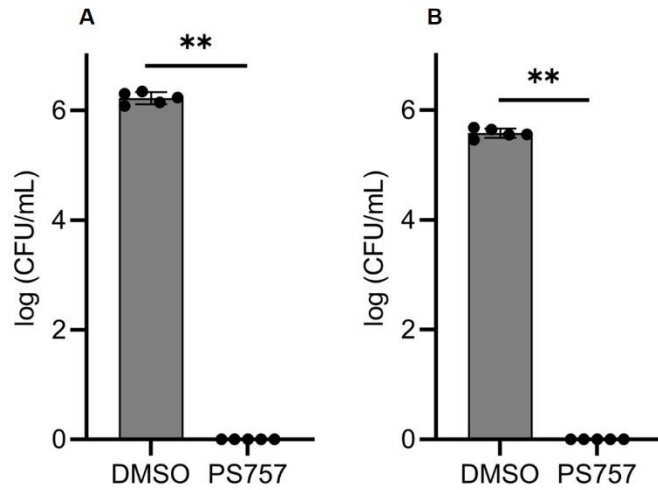

**Fig. S1. GmPcide PS757 demonstrates robust bactericidal activity against the exponential- and stationary-phase of *S. pyogenes* HSC5 cells. (A)** Exponential-phase (7 hours post inoculum) *S. pyogenes* HSC5 cells treated under bactericidal (20  $\mu$ M) concentration of PS757 for 12 hours were observed with > 6.0 logCFU reduction. **(B)** Stationary-phase (14 hours post inoculum) *S. pyogenes* HSC5 cells treated under bactericidal (20  $\mu$ M) concentration of PS757 for 12 hours were observed with > 5.0 logCFU reduction. Statistics were performed with Mann-Whitney U test.  $P \leq 0.05$  is considered as statistically significant. \* $P \leq 0.05$ , \*\* $P < 0.01$ , \*\*\* $P < 0.001$ , \*\*\*\* $P < 0.0001$ , ns indicates not significant.

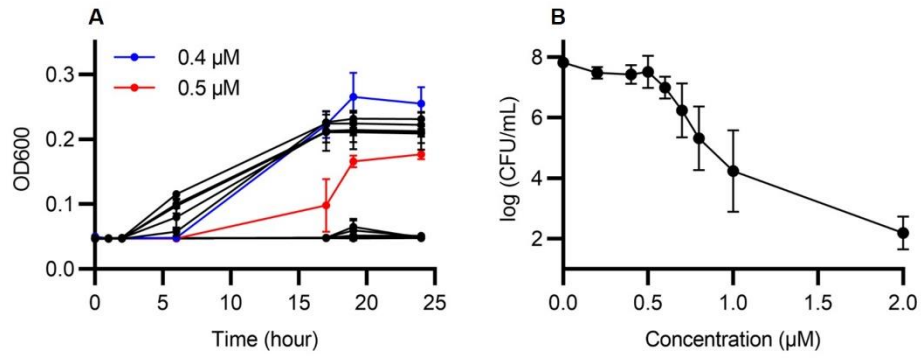

**Fig. S2.** Sublethal concentration of GmPcide PS757 against *S. pyogenes* HSC5 was determined in microplate assay using C medium by measuring both **(A)** OD600 and **(B)** CFU, which identified 0.4  $\mu\text{M}$  as the sublethal concentration of PS757 against *S. pyogenes* HSC5.

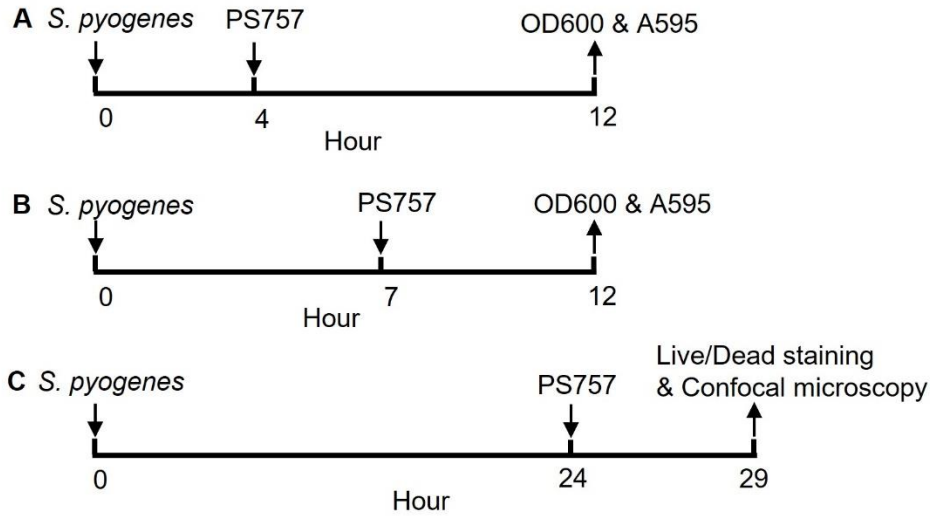

**Fig. S3. GmPcide PS757 treatment to different phases of *S. pyogenes* biofilm. (A)** GmPcide PS757 treatment to *S. pyogenes* HSC5 biofilm at 4 hrs during initiation phase. **(B)** GmPcide PS757 treatment to *S. pyogenes* HSC5 biofilm 7 hrs during maturing development. **(C)** GmPcide PS757 treatment to mature *S. pyogenes* HSC5 biofilm at 24 hrs.

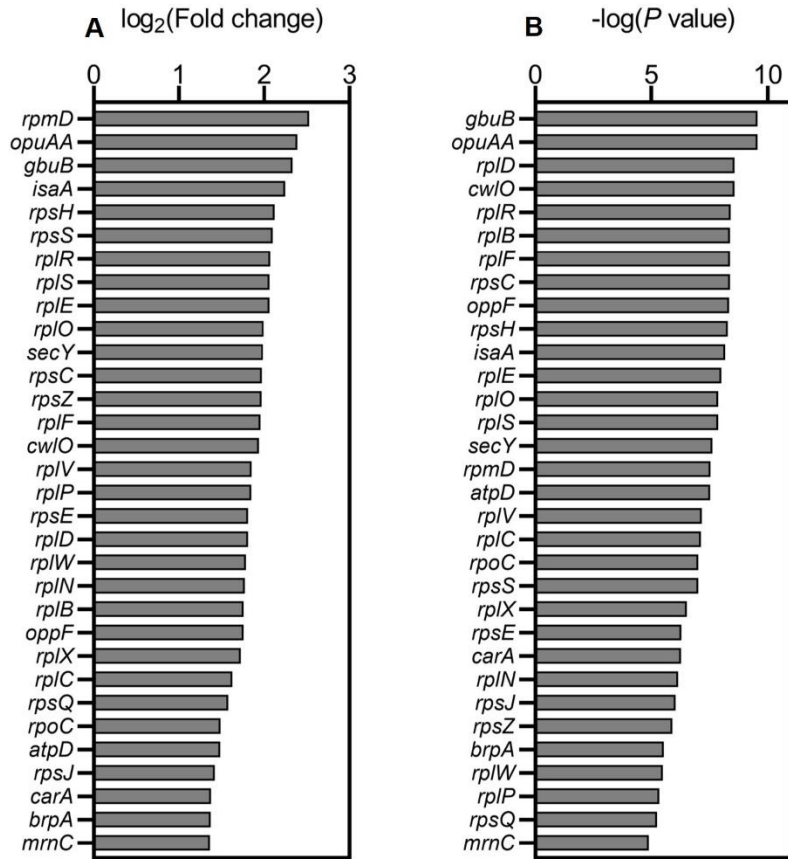

**Fig. S4.** Differentially expressed genes (DEGs) induced by PS757 treatment were identified as  $\log_2(\text{FC}) > 0.5$  and  $P < 0.05$  in the comparative RNA-seq analysis. Among DEGs, two more stringent selection criteria,  $|\log_2(\text{FC})|$  **(A)** and  $-\log(P)$  **(B)**  $> 99\%$  confidence intervals (CI) upper limits were applied to select the most up-regulated group of genes, which identified 32 most up-regulated genes featuring the involvement of two ribosomal protein-associated pathways, Rpl and Rps.

## SUPPLEMENTARY TABLES

**Table S1.** The list of most down- and up-regulate *S. pyogenes* genes induced by sublethal PS757 treatment identified by comparative transcriptomic analysis.

| Differentially expressed levels (DEs) | Differentially expressed genes (DEGs)                                                                                                                                                                       |
|---------------------------------------|-------------------------------------------------------------------------------------------------------------------------------------------------------------------------------------------------------------|
| Most down-regulated                   | <i>emm5, malQ, udp, malX, nupX, ycjP, arlR, NA, NA</i>                                                                                                                                                      |
| Most up-regulated                     | <i>rpmD, opuAA, gbuB, isaA, rpsH, rpsS, rplR, rplS, rplE, rplO, secY, rpsC, rpsZ, rplF, cwI/O, rplV, rplP, rpsE, rplD, rplW, rplN, rplB, oppF, rplX, rplC, rpsQ, rpoC, atpD, rpsJ, carA, brpA, mrnC, NA</i> |
